## **Crop modeling defines opportunities and challenges for drought escape, water capture, and yield increase using chilling-tolerant sorghum**

Rubí Raymundo<sup>1</sup>, Ignacio A. Ciampitti<sup>2</sup>, and Geoffrey Morris<sup>1\*</sup>

<sup>1</sup> Department of Soil and Crop Science, Colorado State University, Fort Collins, CO 80523 USA

<sup>2</sup> Department of Agronomy, Kansas State University, Manhattan, KS, 66506 USA

\* Corresponding author: Geoff.Morris@colostate.edu

# ABSTRACT

Many crop species, particularly those of tropical origin, are chilling sensitive so improved chilling tolerance can enhance production of these crops in temperate regions. For the cereal crop sorghum (*Sorghum bicolor* L.) early planting and chilling tolerance have been investigated for >50 years, but the potential value or tradeoffs of this genotype  $\times$  management change has not been formally evaluated with modeling. To assess the potential of early-planted chilling-tolerant grain sorghum in the central US sorghum belt, we conducted CERES-Sorghum simulations and characterized scenarios under which this change would be expected to enhance (or diminish) drought escape, water capture, or yield. We conducted crop growth modeling for a full- and short-season hybrids under rainfed systems that were simulated to be planted in early (mid-April), normal (mid-May), and late (mid-June) planting dates from 1986 to 2015 in four locations in Kansas representative of the central US sorghum belt. Simulations indicated that early planting will generally lead to lower initial soil moisture, longer growing periods, and higher evapotranspiration. Early planting is expected to extend the growing period by 20% for short- or full-season hybrids, reduce evaporation during fallow periods, and increase plant transpiration in the two-thirds of years with the highest precipitation (mean > 428 mm), leading to 11% and 7% increase grain yield for short- and full-season hybrids, respectively. Thus, in this major sorghum growing region early planting could reduce risks of terminal droughts, extend seasons, and increase rotation options, suggesting that further development of chilling tolerant hybrids is warranted.

**Keywords:** Stress tolerance, crop growth model, crop adaptation, plant breeding, agronomy.

## INTRODUCTION

Sustainable agriculture in water-limited environments requires cropping systems with low water requirements and relatively high productivity per unit of water used (Tilman et al., 2002; Zhang et al., 2018). Breeding programs generally rely on multi-environment trials in the target environment to assess the performance of genotypes and evaluate novel traits. However, this approach has limitations: (i) resources to deploy such trials are often limited, (ii) it is difficult to reproduce and/or interpret findings from year to year due to spatio-temporal variability of environmental conditions, and (iii) in most of the cases the novel trait is not yet available in commercial varieties, so cannot be studied in relevant genetic backgrounds (Lenaerts et al., 2019). In this context, crop growth models complement field experiments (van Ittersum et al., 2003; Challinor et al., 2018) to help breeding programs evaluate the potential value of novel traits within an existing or novel cropping system (Aggarwal et al., 1997; Chenu et al., 2017; Cooper et al., 2002). Models can be used to evaluate the potential benefits and tradeoffs of combining new genotypes and new management approaches in the target production environments, by accounting for interactions of genotype, environment and management (G×E×M) (Chenu et al., 2013; Kholová et al., 2014; Singh et al., 2014).

Sorghum (*Sorghum bicolor* L. Moench) is one of the most drought resilient crops, grown worldwide for grain, forage, and biomass (Adegbeye et al., 2020). The crop originated in the warm semiarid tropics of Africa (Doggett and Majisu, 1968) and diffused widely, including to semiarid and subhumid temperate regions of the world (Smith and Frederiksen, 2000). However, like many tropical-origin crops, sorghum is sensitive to chilling (0-16 C) (Lyons, 1973; Taylor and Rowley, 1971). Chilling sensitivity may be an ancestral trait stemming from sorghum's origin and adaptation in warm climates, or a derived trait originating inadvertently during selection for non tannin and/or semi-dwarf traits (Marla et al., 2019). Following Vavilov's phytogeographic approach, seedling chilling tolerance was identified in high-latitude Asian (Stickler et al., 1962) and high-altitude African (Singh, 1985) landraces, and more recently the trait was genetically mapped (Burow et al., 2011; Chopra et al., 2017; Marla et al., 2019). However, this trait has remained a breeding target for >50 years and has not been deployed in commercial grain sorghum hybrids. Research and development on chilling-tolerant sorghum remains ongoing in Europe (Schaffasz et al., 2019), Asia (Mocoeur et al., 2015) Australia (Wylie, 2008), and the Americas (Marla et al., 2019).

In temperate production regions, chilling temperatures restrict the sorghum growing season from late spring to fall (Ercoli et al., 2004). In the semi-arid region of the US sorghum belt (Laingen, 2015), a commercial hybrid with early-chilling tolerance trait has the potential to change the agricultural landscape by shifting planting dates from late spring to early spring to hypothetically position the crop in better environments to ensure early establishment (Burow et al., 2011; Franks et al., 2006; Kapanigowda et al., 2013). In the US, the state of Kansas leads grain sorghum production with 40% of national production on 2.7 million acres, mostly (>90%) under rainfed conditions (Laingen, 2015). Early crop establishment could potentially extend the crop growing period, synchronizing crop water demand and soil water supply during the grain

filling to avoid terminal droughts. Furthermore, early planting practices can facilitate integrating the crop into a double crop rotation to maximize farm productivity (Burow et al., 2011). For these reasons, it is believed that the early-season chilling tolerance trait would make the crop more competitive for farmers and an alternative option to outperform traditional crops with high water demand and less adapted to dryland systems (Bhattarai et al., 2019).

Ongoing efforts to improve chilling tolerance in sorghum (Burke et al., 2019; Chopra et al., 2017; Marla et al., 2019; Ostmeyer et al., 2020) are based on the hypothesis that early planting of a sorghum hybrid with chilling tolerance provides a commercial relevant increase in grain yield in the US by extending the season and avoiding late season drought. However, this hypothesis has never been formally evaluated with crop modeling. In this study we used the CERES-Sorghum growth model (Jones et al., 2003; White et al., 2015) to test these hypotheses *in silico*, and quantify the expected agronomic impact of an early-chilling tolerant sorghum hybrids in the northern part of the U.S. sorghum belt. We find support for several of the proposed benefits of early-planted chilling-tolerant sorghum, along with some unanticipated tradeoffs that must be accounted for in the overall G×E×M strategy for this cropping system.

## MATERIALS AND METHODS

### The sorghum cropping system

Kansas has a precipitation gradient decreasing from east to west (Lin et al., 2017) (Figure 1a), with Koppen-Geiger climate classification of continental-humid in the east and semi-arid climate in the west (Pražnikar, 2017). This gradient in environmental conditions has substantially influenced the management of this rainfed crop such as plant density and varietal selection. Recommended plant density declines from east to west, and later maturity hybrids are recommended in the east while earlier maturity hybrids are recommended in the west (Roozeboom and Fjell, 1998). Given sorghum's chilling sensitivity and the common practice of prioritizing planting of other crops, sorghum is one of the later-planted crops in the system with recommended planting dates range from mid-May to mid-June (Shroyer et al., 1998).

### Overview of the model

CERES-Sorghum (White et al., 2015) belongs to the family of crop models available in the Decision Support Systems for Agro technology Transfer-Crop Simulation Model (DSSAT-CSM) (Hoogenboom et al., 2019; Jones et al., 2003). The model simulates the daily dynamics of plant growth, phenology development and partitioning affected by stress factors (White et al., 2015). The daily growth is simulated via the potential carbon assimilation (PCARB) that is calculated using the radiation use efficiency (RUE, g MJ<sup>-1</sup>), photosynthetically active radiation (PAR, MJ m<sup>-2</sup> day<sup>-1</sup>) and the fraction of PAR intercepted ( $1 - \exp^{-k \cdot \text{LAI}}$ ) by the crop (Ritchie et al., 1998), where  $k$  (unitless) represents the extinction coefficient and LAI ( $m_{\text{leaf}}^2 m_{\text{ground}}^{-2}$ ) is the leaf area index. The model simulates daily water stress factors that penalize the daily carbon assimilation (SWFAC) and plant growth (TURFAC) (White et al., 2015). The model requires cultivar-specific genotype parameters (G), environmental information (E), and crop management (M) practices, which are described in detail below.

## Genotype parameters

In the model, G, a set of genotype-specific parameters, represents differences among hybrids (White et al., 2015) that affect phenology development and crop growth. In this study, the difference between early and late season hybrids is represented by the parameter potential duration from emergence to end of juvenile phase (P1) (Table 1). In the model the phenology development is a function of temperature and daylength. The model simulates germination, emergence, end of the juvenile phase, panicle initiation, end of flag leaf expansion, anthesis, beginning of grain filling and physiological maturity. Each phenology stage is the result of the summation of daily thermal time (DTT) calculated via the formula

$$DTT = (T_x + T_n) \times 2^{-1} - T_{base}$$

where  $T_{base}$  is the minimum temperature for thermal time accumulation, set to 8 C (White et al., 2015), and  $T_x$  and  $T_n$  are daily maximum and minimum temperature, respectively. Note, given that the DTT uses a  $T_{base}$  of 8 C and does not implement a chilling damage routine (i.e. there is no penalty to growth or development for temperatures below  $T_{base}$ ) we interpret CERES-Sorghum as modeling a chilling-tolerant sorghum genotype by default. The summation of DTT to reach a phenology stage is indicated in Table 1 (e.g. P1: Potential duration from emergence to end of juvenile phase). The only phenology stage affected by both temperature and daylength is the duration from the end of juvenile stage to panicle initiation, represented by parameters P2R and P2O (Table 1). The plant leaf growth and panicle partitioning are determined by parameter G1 and G2, respectively.

## Environmental data

In the model, E comprises daily weather data and multilayer soil profile parameters. Daily weather data, including precipitation (mm), solar radiation ( $\text{MJ m}^{-2} \text{day}^{-1}$ ), and daily maximum ( $^{\circ}\text{C}$ ) and minimum temperature ( $^{\circ}\text{C}$ ) was obtained for agronomic research sites (Manhattan, Hays, Garden City, and Colby) from Kansas Mesonet from 1986 to 2015 (Kansas Mesonet, 2020). Soil profile information was downloaded from the web soil survey (Soil Survey Staff, 2020) and detailed soil characteristics such as soil texture (%), bulk density ( $\text{g ml}^{-1}$ ), organic carbon (%), pH, wilting point (LL), field capacity (DUL), saturation (SAT), and soil root growth factor (SRGF) for each site are presented in Table S1. The model computes the differences between DUL and LL, and between SAT and DUL, to predict the daily soil extractable water and the water drained in each soil layer, respectively. And, the SRGF represents the physical or chemical constraints in each soil profile.

## Management practices

The model requires realistic agronomic management (M) data such as planting date, planting density, row spacing, fertilization, and water supply. In this study, the crop was simulated to be planted each year in mid-April, mid-May, and mid-June at a row distance of 76 cm, a planting depth of 3 cm, and nitrogen fertilizer rates of  $190 \text{ kg ha}^{-1}$ . Plant density was  $14 \text{ plants m}^{-2}$  in Manhattan,  $8 \text{ plants m}^{-2}$  in Hays, and  $6 \text{ plants m}^{-2}$  in both Garden City and Colby. Given that sorghum grows mostly under dryland systems across Kansas, simulations were performed under rainfed conditions.

## Seasonal simulation settings

As outlined above, information on G, E, and M were defined for each research site. Simulations under rainfed conditions started on the first day of each year with 80% of soil moisture, 3 Mg ha<sup>-1</sup> of surface residue, and 2 Mg ha<sup>-1</sup> of root residue. Evapotranspiration was calculated with the Priestley-Taylor/Ritchie formula (Priestley and Taylor, 1972). Soil water infiltration was computed with the capacity approach method (Ritchie et al., 1998) and soil evaporation was estimated with the Suleiman-Ritchie method (Suleiman and Ritchie, 2003). Dynamics of carbon and nitrogen was simulated with the CENTURY model.

## Evaluation of model performance

For planting dates in early and mid June, CERES-Sorghum has shown satisfactory predictions for anthesis, grain yield, and evapotranspiration across Kansas (Araya et al., 2017; Staggenborg and Vanderlip, 2005; White et al., 2015). To evaluate the model accuracy in predicting days to emergence for a chilling-tolerant genotype (Kaoliang), simulations were conducted to match field experiments that were planted in April, May, and June in 2016–2018 at three sites in Kansas (Marla et al., 2019). For these simulations, cultivar specific-parameters (G) were obtained for full-season hybrids (80 days to anthesis and 140 days to physiological maturity) and short-season hybrids (60 days to anthesis and 110 to physiological maturity) (Araya et al., 2018). The model accuracy was quantified using the root mean square error (RMSE) that determines the distance of model prediction from a perfect prediction (Wallach et al., 2014). Unlike commercial grain sorghum hybrids with semi-dwarf stature and high sink capacity, kaoliang sorghum has undesirable traits for this cropping system such as tall plants and low harvest index (Marla et al., 2019). Due to these differences, the direct comparison of observed and simulated grain weight for these known chilling tolerant genotypes is not possible. In our simulations the genotype used across all planting dates have the same cultivar parameters (Table 1) so the effect of planting date can be isolated.

## Statistical analysis and interpretation

Statistical analyses were performed in the R statistical environment (R Core Team, 2017) with lmer (Bates et al., 2015) for mixed linear models and visualized using ggplot (Villanueva and Chen, 2019). Analysis scripts are provided in Supplemental File 1 and data are provided in Supplemental File 2. The observed annual precipitation, averaged across locations, was used to classify years into three "precipitation level" quantiles: "dry" years (161–428 mm), "moderate" years (428–580 mm), and "wet" years (580–1380 mm). Note, this classification is not intended as a formal envirotyping of water deficit scenarios (Chenu et al., 2013) but to reflect the type of informal classification used by growers and agronomic practitioners in the region (Baeumler and Gupta, 2020). The effects of planting date and the interaction of planting date and precipitation levels on all variables were tested using analysis of variance (ANOVA), considering planting date, precipitation level, and hybrid type as fixed factors, and location and year as random factors. Tukey test for the interaction of planting date and precipitation levels was performed when the *F* value was below an  $\alpha < 0.05$  significance threshold. Daily transpiration and water stress events were assigned to vegetative and reproductive stages. Daily soil evaporation was

aggregated into fallow and growing periods. Soil evaporation was identical from January 1 to April 15 across all three planting dates, and not modeled from the date of the latest harvest (typically October) to December 31, so these periods were ignored.

## RESULTS

### Model performance for days to emergence

The CERES-Sorghum model performance for days to emergence was evaluated by comparing observed and simulated days to emergence for experiments conducted on different planting dates in Kansas (Figure 1b). For six experiments planted in April, observed days to seedling emergence ranged from 13 to 19 days, while simulated days to emergence ranged from 11 to 18 days. For two experiments planted in May, observed days to emergence were 5 and 7 and the corresponding simulated values were 6 and 8 days, respectively. For the only experiment planted in June the observation and simulation indicated 4 and 6 days to emergence, respectively. Overall, our results of RMSE of 1.7 days for all experiments indicate that model predictions for days to emergence for a chilling tolerant genotype in early and normal planting dates were reliable.

### Soil moisture at planting

At each location and year, simulations started on January 1 to accrue soil moisture in the soil profile as a function of daily precipitation (Figure 2). In this growing region, high variability of monthly precipitation is observed from May to August (Figure 2a). The direct impact of precipitation in soil moisture is illustrated in Figure 2b and 2c, where the soil moisture or extractable soil water on each planting date varied across locations, with less soil moisture in western locations than in eastern locations and less soil moisture in early planting (mid-April) dates than in late planting dates (mid-June). In general, less moisture accrued prior to planting for early planting dates (158  $\pm$  35 mm) compared to normal (168  $\pm$  40 mm) and late planting dates (185  $\pm$  46 mm).

### Growing season length

In each year, the phenology development and corresponding environmental conditions were classified into days from planting to seedling emergence, vegetative growth (days from seedling emergence to anthesis), and reproductive growth (days from anthesis to physiological maturity) (Figure 3, Table S2). Simulations indicated that shifting planting dates from late to early spring slowed down the rate of seedling emergence. For instance, in early, normal, and late planting dates seedlings are expected to emerge 16, 10, and 6 days after planting, respectively. The number of days to seedling emergence and vegetative growth were greater in western regions than in eastern regions (Figure 3a and 3b). For both full- and short-season hybrids, early planting dates extended the vegetative stage and shortened the reproductive stage. By contrast, late planting dates shortened the vegetative stage and extended the reproductive stage (Figure 3, Table S2). For instance, a full-season hybrid that was simulated to be planted in early and late spring completed the vegetative growth in 79 and 63 days and reproductive growth in 44 and 48 days, respectively (Table S2).

## **Temperatures experienced by growth stage**

Early and late planting scenarios led to contrasting temperature profiles during the growing period (Figure 3d-f), as summarized by the maximum ( $T_{max}$ ) and minimum ( $T_{min}$ ) temperatures experienced by the crop at the given stage (Table S2). When a full-season hybrid was simulated to be planted in mid-April, it experienced a temperature trend from low (vegetative stage) to high (reproductive stage). By contrast, when planted in mid-June, it experienced a temperature trend from high (vegetative stage) to low (reproductive stage).

In general, across all three planting dates most of the precipitation (from 63–65%) occurred during the vegetative growth (Table S2). On average, in early planting dates the crop experienced slightly higher seasonal precipitation compared to late planting (347 mm vs. 263 mm for full-season hybrids; 310 mm vs. 240 mm for short-season hybrids). In western sites, temperatures were lower than in the eastern sites. For instance, given late planting, during reproductive stages the minimum temperature in the northwestern site (Colby) was 11 C and in the eastern site (Manhattan) was 14 C.

## **Soil evaporation in fallow and growing periods**

Daily soil evaporation was aggregated into fallow and growing periods and compared across planting date and hybrid type. Simulations of a full-season hybrid indicate that on average across all planting dates, 30% of soil evaporation occurred in fallow periods and 70% during growing periods. Most of the soil evaporation during the growing period occurred before anthesis (53% of total soil evaporation). For all precipitation levels (dry, moderate, and wet years), early planting dates significantly reduced the total soil evaporation compared with late planting dates (Figure 4a, upper panel). Likewise, for all precipitation levels, early planting dates reduced the soil evaporation during fallow periods (Figure 4a, lower panel, upper bars light colors) but increased the soil evaporation during the growing periods (Figure 4a, lower panel, lower bars and dark colors).

## **Plant transpiration**

Daily transpiration for simulated full- and short-season hybrids was aggregated into vegetative and reproductive growth for each planting date in each year (Table S3). As would be expected, transpiration was substantially higher in the wet years (289 mm) compared to moderate (212 mm) or dry years (128 mm) across all planting dates. Simulations for a full-season hybrid indicated higher average total transpiration or water capture for early planting dates (236 mm) than normal (232 mm) or late planting dates (211 mm). In dry years, total transpiration was similar in all planting dates (Figure 4b, upper panel). In both, moderate and wet years, early planting dates significantly increased plant transpiration compared with late planting dates (Figure 4b, upper panel).

During vegetative growth, differences in plant transpiration were inconsistent among planting dates in all precipitation levels (Figure 4b, lower panel, upper bars and light color). During reproductive growth, discrepancies in transpiration among planting dates were negligible only in dry years. However, these discrepancies in transpiration among planting dates were consistent, in both, moderate and wet years (Figure 4b, lower panel, lower bars and dark colors).

Overall for a full-season hybrid, in dry years, transpiration during reproductive growth in early and late planting dates averaged 27% and 21%, respectively. By contrast, in wet years, transpiration during reproductive growth was greater, averaging 44% and 42% of transpiration for early and late planting, respectively. This suggests that early planting can lead to drought escape under favorable scenarios.

### **Water stress events**

CERES-Sorghum has two water stress factors whose values range from 0 (no stress) to 1 (stress). In this study a water stress event is defined when the minimum value between water deficit factor for photosynthesis (SWFAC) or water deficit factor for development (TURFAC) was higher than 0.6. Next, the number of water stress events were aggregated into vegetative and reproductive growth and are presented in Table S4. Simulations for a full-season hybrid indicate that on average the number of days under water stress during the growing period in early, normal, and late planting dates was 31, 32 and 28, respectively. Similarly, on average across all planting dates the number of water stress events during the growing period was higher in dry years (39), followed by moderate (30) and wet years (12).

The number of days under water stress in different planting dates and precipitation levels during the growing period for a full-season hybrid is provided in Figure 4c. During the growing period (Figure 4c, upper panel) and during vegetative stage (Figure 4c, upper bars and light color) the frequency of water stress events among planting dates was negligible in all precipitation levels. During the reproductive stage the frequency of water stress events was significantly higher in early and normal planting dates in all precipitation levels (Figure 4c, lower bars and dark color).

### **Grain yield**

CERES-Sorghum simulates the plant-soil-water dynamics on a daily time step that finally is translated into grain yield. To evaluate the effect of planting date on grain yield, we have conducted simulations for full- and short-season hybrids (Figure 5 and Table S5). The simulated grain yield over 1986–2015 averaged 4 Mg ha<sup>-1</sup> across locations, planting dates, and hybrids, and ranged from 0 to 12 Mg ha<sup>-1</sup>. Zero yield was obtained in 1989 in the northwest site (Colby) for all planting dates due to exceptionally low annual precipitation (161 mm) and in 2004 in the southwest site (Garden City) due to low precipitation in early spring. In general, grain yield varied significantly among planting dates ( $p < 0.001$ ), precipitation levels ( $p < 0.001$ ) and hybrids ( $p < 0.001$ ).

Low grain yield was obtained in dry years, as expected, and differences in grain yield among planting dates were negligible. For instance, in dry years, the simulated yield for full-season hybrid was 1.6 Mg ha<sup>-1</sup>, not significantly different ( $p > 0.05$ ) from yields of either normal or late planting dates. In wet years, by contrast, yields were higher for early and normal planting versus late planting. For instance, in wet years early planting dates averaged 7.4 Mg ha<sup>-1</sup> for a full-season hybrid, 13% greater than the mean for late planting dates (6.5 Mg ha<sup>-1</sup>).

Overall, interactions between planting dates and hybrids were not significant (Table S5), indicating similar trends for both maturing genotypes with early and normal planting dates with

yield increase in environments from moderate to high precipitation. Nevertheless, grain yield across locations for full- and short-season hybrids in contrasting sites (Table S6) indicated that short-season hybrids can contribute a slight yield increase for late planting dates. For instance, in the northwestern site (Colby) under late planting, the grain yield of a short-season hybrid was 2.9 Mg ha<sup>-1</sup> and for a full-season hybrid was 2.6 Mg ha<sup>-1</sup>. Overall, results indicate that early planting of chilling-tolerant sorghum hybrids can potentially increase grain yield in 66% of the years.

## DISCUSSION

### Validity of the modeling approach for the target cropping system

After more than 50 years of breeding for the early-planted chilling tolerance trait in grain sorghum, this study provides insights on the impact of this G × E × M intervention at crop scale, narrowing the bridge between genotype to phenotype. To this end, this study used an agricultural systems tool, the CERES-Sorghum model, because it is one of the most widely used sorghum models (Adam et al., 2018; Amouzou et al., 2019; Folliard et al., 2004; Fu et al., 2016; Kothari et al., 2020; Pachta, 2007; Singh et al., 2014), and its accuracy has been established for simulations of grain yield in Kansas for normal planting dates (Araya et al., 2017; Staggenborg and Vanderlip, 2005; White et al., 2015). Further, the model accuracy in predicting days of emergence for early and normal planting dates (Figure 1b) suggests that the CERES-Sorghum model is likely appropriate to forecast the effects of variables analyzed in this study.

Still, the congruence between observed and simulated values for soil moisture, evapotranspiration, soil evaporation, and transpiration for the CERES-Sorghum model has not yet been demonstrated. Crop model applications rely on rigorous model testing or model comparison between observed versus simulated variables (Wallach et al., 2014). Other models such as APSIM-Maize and APSIM-Soybean simulated field observations of soil moisture for maize and soybean (Ebrahimi-Mollabashi et al., 2019; Yang et al., 2018). Likewise, observed seasonal evapotranspiration for sweet sorghum and maize matched those values simulated with crop models CERES-Sorghum and CERES-Maize (Araya et al., 2017; DeJonge et al., 2012; Lopez et al., 2017). Commonly, in sorghum and other cereal crops, crop model evaluation is conducted for grain yield and biomass components (Kassie et al., 2016; Yakoub et al., 2017). Consequently, field experimentation to evaluate water budgets are needed for grain sorghum.

Some aspects of farm conditions not considered by the model may affect the interpretation of our findings. For instance, simulated fallow periods before planting disregard weed growth pressure that can deplete soil moisture and nutrients. Studies in Kansas indicate that in dry years, green fallow or a crop can deplete soil moisture decreasing the productivity of the subsequent winter wheat season (Holman et al., 2016; Schlegel et al., 2017; Schlegel and Havlin, 1997). Note, the fallow period before planting, which allows weed growth, was longer for planting dates in mid-June. For this reason, it is possible that the model overestimates expected soil moisture available at this planting date.

## **Potential benefits of early-planted chilling tolerant sorghum**

In the US maize and sorghum belts, optimum planting windows for maize and soybean vary between mid-April to late-May (Baum et al., 2019; Long et al., 2017; Mourtzinis et al., 2017; Staggenborg et al., 1999a); therefore, these optimum planting windows would be suitable for sorghum. Indeed, simulations show that bringing forward the sorghum planting date in mid-April and mid-May in years with moderate to high precipitation (top two-thirds of years based on annual precipitation) can lead to a yield increase on average by 12% for a full-season hybrid and 7% for a short-season hybrid compared to late planting dates (Table S5). Higher sorghum yields were reported in Kansas in planting dates in early June (Ciampitti et al., 2019). By contrast, when shifting planting dates from June to May, a yield increase (4–35%) was reported in four experiments while a yield decline (-69%) was reported in one experiment (Maiga, 2012). Those experimental findings are in line with our simulations and indicate that early chilling tolerance can increase yields under favorable scenarios (Figure 6). Given that yields in mid-April and mid-May were not substantially different (Figure 5, Table S5), it is likely that the optimum planting window for chilling tolerant sorghum ranges from mid-April to mid-May, similar to those of maize and soybean.

In cereals, drought escape can be achieved through short-season varieties that flower earlier (Blum, 2011; Shavrukov et al., 2017), and in sorghum drought escape is a proposed benefit of early planting and chilling tolerance (Burow et al., 2011; Franks et al., 2006). However, our simulations suggest that the probability of water stress during grain filling would actually be expected to increase slightly for planting dates in early spring (Figure 4c). The results to some extent support that it is possible to avoid the terminal drought by increasing plant transpiration or water capture in years with moderate to high precipitation (Figure 4b). In our simulations, the reduction of soil evaporation during the fallow portion of the season can not directly be capitalized into grain yield, but this water budget can hypothetically benefit a double crop rotation (Burow et al., 2011) or be available in the soil profile for the subsequent cropping season (Figure S2). In dryland systems of western Kansas, wheat-sorghum is a common crop rotation due to benefits in grain yield and soil water moisture (Schlegel and Havlin, 1997). Using an early-planted chilling-tolerant grain sorghum in this rotation can potentially further improve grain yield and water productivity for both crops. Additional simulations of crop rotations would be needed to assess these benefits.

## **Expected tradeoffs for early and late planting dates**

Environmental conditions dictate the rate of phenology development. Planting dates in early spring extended the duration of the growing season (Figure 3, Table S2), especially days for seedling emergence and days to anthesis, as previously predicted (Burow et al., 2011) and observed (Kapanigowda et al., 2013). The delay in seedling emergence in early spring (Figure 3) was additionally associated with low levels of soil moisture (Figure 2). Although, studies on chilling tolerance in field conditions (Maulana and Tesso, 2013; Ostmeyer et al., 2020) do not report the effect of soil moisture on germination and seedling emergence. Soil moisture deficit and low temperature both impair germination and delay emergence in sorghum (Evans et al.,

1961), but their interactions are not well understood. Consequently, our study suggests that hybrids with chilling tolerance should be planted under optimum levels of initial soil moisture to ensure early crop establishment, as recommended for other crops such as maize (Lu et al., 2017).

Sorghum grain yield is affected when the crop experiences extreme temperatures, above 38 C and below 11 C, during grain filling (Singh et al., 2015; Staggenborg et al., 1999b). In our simulations, early planting exposed the crop to moderately high temperatures (<38 C) during grain filling. By contrast, late planting exposed the crop to temperatures below 10 C during grain filling in 50% of the years in the northwest site (Colby) (Figure 3f and Table S6). Risk of freezing temperatures for late planting dates were reported in studies conducted in Kansas, Colorado and Texas (Baumhardt and Howell, 2006; McMaster et al., 2016; Staggenborg et al., 1999b; Staggenborg and Vanderlip, 1996). Furthermore, in Colorado short-season hybrids can avoid freezing temperatures during grain filling for planting dates in late spring (McMaster et al., 2016).

Climate change, which was not accounted for in our simulations, may affect the potential benefits and tradeoffs for early planting of chilling-tolerant sorghum. For instance, climate time series analysis in Kansas indicates that the frost risk events have become less frequent in the last decade (Lin et al., 2017) and global temperatures are expected to rise another 0.5–2.5 C by mid-century (IPCC, 2013). In future scenarios it is possible that the risk of heat stress during flowering can increase for early planting, while the frequency of frost damage may not be important for planting dates in late spring. Alternatively, very early planting of chilling-tolerant hybrids could provide heat stress escape. Simulations under future climate scenarios would be needed to resolve these potential tradeoffs.

A potential risk to early and late plantings was the low grain yield in years with low precipitation (Figure 5 and 6), due to the low soil moisture (Figure 2) and high frequency of daily droughts during pre-flowering and post-flowering stages (Figure 4c). This effect was reported in other crops. For instance, in Iowa, locations exposed to earlier water stress exhibited lower soybean yield (Irmak et al., 2002), while across the US midwest, locations with low soil moisture imposed a greater penalty on maize yield (Seifert et al., 2017). In Texas, a simulation study indicated that a short-season hybrid is better adapted to dryland systems when the crop is planted in June (Baumhardt and Howell, 2006). Similar results were obtained for the northwestern site (Colby), where a short-season hybrid yielded higher than a full-season hybrid in planting dates in late spring (Table S6). Overall, low early-season water budgets as a result of low precipitation can override the value of early planting.

### **Next steps for models of chilling tolerance to guide crop improvement**

In breeding and genetics studies, chilling tolerance is most often characterized through seedling emergence rate and seedling vigor scores, usually based on visual evaluation (Burow et al., 2011; Franks et al., 2006; Marla et al., 2019; Parra-Londono et al., 2018). By contrast, crop models simulate days to emergence, seedling biomass weight, and leaf area. CERES-Sorghum, developed for normal conditions, does not model any detrimental effect of chilling temperatures

with respect to seedling emergence or leaf damage. Consequently, the model can not simulate the grain yield for a genotype which was damaged by chilling temperatures.

Future work to extend a chilling sensitive routine could entail penalizing the development rate, growth rate, or leaf area. The development rate can be reduced by shifting the base temperature (e.g. from 8 C to 10 C) and varying the duration from planting to emergence. For instance, currently thermal time from planting to germination (50 C day) and the coleoptile extension rate (0.1 C day cm<sup>-1</sup>) are fixed parameters. Chilling tolerant genotypes can attain 50% seedling emergence two days earlier than their susceptible counterparts (Stickler et al., 1962), suggesting that there is variability for base temperature, thermal time from planting to germination, and/or coleoptile extension rate. Indeed, differences for base temperature (0–9.8 C) were recently reported for Ethiopian sorghum germplasm, which is believed to harbor adaptations to chilling-prone high-altitude regions (Tirfessa et al., 2020).

In this study, simulations were aggregated into three precipitation levels using a simple quantile classification. Although the frequency of water stress corresponded well to each precipitation level (Figure 4c) the daily water stress can be used to characterize drought patterns more precisely. For instance, the APSIM-Wheat and the SSM model were used to classify and quantify drought patterns across the Australian wheat belt (Chenu et al., 2013) and the US maize belt (Messina et al., 2015), respectively. Thus, the characterization of drought patterns (i.e. envirotyping) with CERES-Sorghum, in these locations and across the US sorghum belt would guide crop improvement programs to focus on traits better-suited for target environments.

Overall, through years of field experimentation, research on early season chilling tolerance pointed out the potential outcomes of a sorghum hybrid with this trait. This study has shown that a crop simulation model can translate the genetic value of this breeding trait in terms of grain yield by integrating environmental conditions (i.e. the impact of annual variability) and realistic agronomic management. Furthermore, this study tested hypotheses regarding benefits of early chilling tolerance proving that it is difficult to informally predict the state of any variable (i.e. evapotranspiration) at crop system scale, without formal modeling. Thus, our study underscores the value of crop modeling to complement and guide plant breeding and genetics.

## ACKNOWLEDGEMENTS

This study was supported by funding from the Foundation for Food and Agriculture Research - Seeding Solution "CA18-SS-0000000094 – Bridging the Genome-to-Phenome Breeding Gap for Water-Efficient Crop Yields (G2P Bridge)" to G.P.M. and I.C; the Kansas Department of Agriculture "Collaborative Sorghum Investment Program Water Optimized Sorghum for Kansas" to G.P.M; and the Kansas Grain Sorghum Commission. We thank Mark Cooper, Terry Felderhoff, Sandeep Marla, and Sarah Sexton-Bowser for suggestions that motivated and improved this study.

## REFERENCES

- Adam, M., Dzotsi, K.A., Hoogenboom, G., Traoré, P.C.S., Porter, C.H., Rattunde, H.F.W., Nebie, B., Leiser, W.L., Weltzien, E., Jones, J.W., 2018. Modelling varietal differences in response to phosphorus in West African sorghum. *European Journal of Agronomy*, Recent advances in crop modelling to support sustainable agricultural production and food security under global change 100, 35–43. <https://doi.org/10.1016/j.eja.2018.04.001>
- Adegbeye, M.J., Ravi Kanth Reddy, P., Obaisi, A.I., Elghandour, M.M.M.Y., Oyebamiji, K.J., Salem, A.Z.M., Morakinyo-Fasipe, O.T., Cipriano-Salazar, M., Camacho-Díaz, L.M., 2020. Sustainable agriculture options for production, greenhouse gasses and pollution alleviation, and nutrient recycling in emerging and transitional nations - An overview. *Journal of Cleaner Production* 242, 118319. <https://doi.org/10.1016/j.jclepro.2019.118319>
- Aggarwal, P.K., Kropff, M.J., Cassman, K.G., ten Berge, H.F.M., 1997. Simulating genotypic strategies for increasing rice yield potential in irrigated, tropical environments. *Field Crops Research, Special Issue: Applications of Rice Modelling* 51, 5–17. [https://doi.org/10.1016/S0378-4290\(96\)01044-1](https://doi.org/10.1016/S0378-4290(96)01044-1)
- Amouzou, K.A., Lamers, J.P.A., Naab, J.B., Borgemeister, C., Vlek, P.L.G., Becker, M., 2019. Climate change impact on water- and nitrogen-use efficiencies and yields of maize and sorghum in the northern Benin dry savanna, West Africa. *Field Crop. Res.* 235, 104–117. <https://doi.org/10.1016/j.fcr.2019.02.021>
- Araya, A., Kisekka, I., Gowda, P.H., Prasad, P.V.V., 2018. Grain sorghum production functions under different irrigation capacities. *Agricultural Water Management* 203, 261–271. <https://doi.org/10.1016/j.agwat.2018.03.010>
- Araya, A., Kisekka, I., Gowda, P.H., Prasad, P.V.V., 2017. Evaluation of water-limited cropping systems in a semi-arid climate using DSSAT-CSM. *Agricultural Systems* 150, 86–98. <https://doi.org/10.1016/j.agsy.2016.10.007>
- Baeumler, N.W., Gupta, S.C., 2020. Precipitation as the Primary Driver of Variability in River Nitrogen Loads in the Midwest United States. *JAWRA Journal of the American Water Resources Association* 56, 113–133. <https://doi.org/10.1111/1752-1688.12809>
- Bates, D., Maechler, M., Bolker, B.M., Walker, S.C., 2015. Fitting Linear Mixed-Effects Models Using lme4. *J. Stat. Softw.* 67, 1–48. <https://doi.org/10.18637/jss.v067.i01>
- Baum, M.E., Archontoulis, S.V., Licht, M.A., 2019. Planting Date, Hybrid Maturity, and Weather Effects on Maize Yield and Crop Stage. *Agronomy Journal* 111, 303–313. <https://doi.org/10.2134/agronj2018.04.0297>
- Baumhardt, R.L., Howell, T.A., 2006. Seeding Practices, Cultivar Maturity, and Irrigation Effects on Simulated Grain Sorghum Yield. *Agronomy Journal; Madison* 98, 462–470.
- Bhattarai, B., Singh, S., West, C.P., Saini, R., 2019. Forage Potential of Pearl Millet and Forage Sorghum Alternatives to Corn under the Water-Limiting Conditions of the Texas High Plains: A Review. *Crop, Forage & Turfgrass Management* 5. <https://doi.org/10.2134/cftm2019.08.0058>
- Blum, A., 2011. Drought Resistance and Its Improvement, Plant Breeding for Water-Limited Environments. Springer-Verlag Berlin, Berlin. [https://doi.org/10.1007/978-1-4419-7491-4\\_3](https://doi.org/10.1007/978-1-4419-7491-4_3)
- Burke, J.J., Emendack, Y., Hayes, C., Xin, Z., Burow, G., 2019. Registration of Five Grain Sorghum Lines with Early-Season Seedling Cold Tolerance. *Journal of Plant Registrations* 13, 422–426. <https://doi.org/10.3198/jpr2019.02.0010crg>

- Burow, G., Burke, J.J., Xin, Z., Franks, C.D., 2011. Genetic dissection of early-season cold tolerance in sorghum (*Sorghum bicolor* (L.) Moench). *Mol Breeding* 28, 391–402. <https://doi.org/10.1007/s11032-010-9491-4>
- Challinor, A.J., Müller, C., Asseng, S., Deva, C., Nicklin, K.J., Wallach, D., Vanuytrecht, E., Whitfield, S., Ramirez-Villegas, J., Koehler, A.-K., 2018. Improving the use of crop models for risk assessment and climate change adaptation. *Agricultural Systems* 159, 296–306. <https://doi.org/10.1016/j.agsy.2017.07.010>
- Chenu, K., Dehifard, R., Chapman, S.C., 2013. Large-scale characterization of drought pattern: a continent-wide modelling approach applied to the Australian wheatbelt – spatial and temporal trends. *New Phytologist* 198, 801–820. <https://doi.org/10.1111/nph.12192>
- Chenu, K., Porter, J.R., Martre, P., Basso, B., Chapman, S.C., Ewert, F., Bindi, M., Asseng, S., 2017. Contribution of Crop Models to Adaptation in Wheat. *Trends in Plant Science* 22, 472–490. <https://doi.org/10.1016/j.tplants.2017.02.003>
- Chopra, R., Burow, G., Burke, J.J., Gladman, N., Xin, Z., 2017. Genome-wide association analysis of seedling traits in diverse Sorghum germplasm under thermal stress. *BMC Plant Biology* 17. <http://dx.doi.org.ezproxy2.library.colostate.edu/10.1186/s12870-016-0966-2>
- Ciampitti, I.A., Prasad, P.V.V., Schlegel, A.J., Haag, L., Schnell, R.W., Arnall, B., Lofton, J., 2019. Genotype × Environment × Management Interactions: US Sorghum Cropping Systems, in: *Sorghum*. John Wiley & Sons, Ltd, pp. 277–296. <https://doi.org/10.2134/agronmonogr58.c13>
- Cooper, M., Chapman, S.C., Podlich, D.W., Hammer, G.L., 2002. The GP Problem: Quantifying Gene-to-Phenotype Relationships. In *Silico Biology* 2, 151–164.
- DeJonge, K.C., Ascough, J.C., Andales, A.A., Hansen, N.C., Garcia, L.A., Arabi, M., 2012. Improving evapotranspiration simulations in the CERES-Maize model under limited irrigation. *Agricultural Water Management* 115, 92–103. <https://doi.org/10.1016/j.agwat.2012.08.013>
- Doggett, H.J., Majisu, B.N., 1968. Disruptive selection in crop development. *Heredity* 23, 1–23. <https://doi.org/10.1038/hdy.1968.1>
- Ebrahimi-Mollabashi, E., Huth, N.I., Holzworth, D.P., Ordóñez, R.A., Hatfield, J.L., Huber, I., Castellano, M.J., Archontoulis, S.V., 2019. Enhancing APSIM to simulate excessive moisture effects on root growth. *Field Crops Research* 236, 58–67. <https://doi.org/10.1016/j.fcr.2019.03.014>
- Ercoli, L., Mariotti, M., Masoni, A., Arduini, I., 2004. Growth responses of sorghum plants to chilling temperature and duration of exposure. *European Journal of Agronomy* 21, 93–103. [https://doi.org/10.1016/S1161-0301\(03\)00093-5](https://doi.org/10.1016/S1161-0301(03)00093-5)
- Evans, W.F., Stickler, F.C., Laude, H.H., 1961. Sorghum Seed Germination as Affected by Moisture and Temperature. *Transactions of the Kansas Academy of Science (1903-)* 64, 210–217. <https://doi.org/10.2307/3626708>
- Folliard, A., Traore, P.C.S., Vaksman, M., Kouressy, M., 2004. Modeling of sorghum response to photoperiod: a threshold-hyperbolic approach. *Field Crop. Res.* 89, 59–70. <https://doi.org/10.1016/j.fcr.2004.01.006>
- Franks, C.D., Burow, G.B., Burke, J.J., 2006. A Comparison of U.S. and Chinese Sorghum Germplasm for Early Season Cold Tolerance. *Crop Science* 46, 1371–1376. <https://doi.org/10.2135/cropsci2005.08-0279>

- Fu, T., Ko, J., Wall, G.W., Pinter, P.J., Kimball, B.A., Ottman, M.J., Kim, H.-Y., 2016. Simulation of climate change impacts on grain sorghum production grown under free air CO<sub>2</sub> enrichment. *Int. Agrophys.* 30, 311–322. <https://doi.org/10.1515/intag-2016-0007>
- Holman, J., Roberts, T., Maxwell, S., 2016. Fallow Replacement Crop (Cover Crops, Annual Forages, and Short-Season Grain Crops) Effects on Wheat and Grain Sorghum Yields. Kansas Agricultural Experiment Station Research Reports 2. <https://doi.org/10.4148/2378-5977.1247>
- Hoogenboom, G., Porter, C.H., Boote, K.J., Shelia, V., Wilkens, P.W., Singh, U., White, J.W., Asseng, S., Lizaso, J.I., Moreno, L.P., Pavan, W., Ogoshi, R., Hunt, L.A., Tsuji, G.Y., Jones, J.W., 2019. The DSSAT crop modeling ecosystem, in: *Advances in Crop Modeling for Sustainable Agriculture*. Burleigh Dodds Science Publishing, Cambridge, United Kingdom, pp. 173–216.
- IPCC, 2013. Summary for Policymakers. *Climate Change 2013: The Physical Science Basis. Contribution of Working Group I to the Fifth Assessment Report of the Intergovernmental Panel on Climate Change*. <https://doi.org/10.1017/CBO9781107415324.004>
- Irmak, A., Batchelor, W.D., Jones, J.W., Irmak, S., Paz, J.O., Beck, H.W., Egeh, M., 2002. Relationship between plant available soil water and yield for explaining soybean yield variability. *Appl. Eng. Agric.* 18, 471–482.
- Jones, J.W., Hoogenboom, G., Porter, C.H., Boote, K.J., Batchelor, W.D., Hunt, L.A., Wilkens, P.W., Singh, U., Gijsman, A.J., Ritchie, J.T., 2003. The DSSAT cropping system model. *European Journal of Agronomy, Modelling Cropping Systems: Science, Software and Applications* 18, 235–265. [https://doi.org/10.1016/S1161-0301\(02\)00107-7](https://doi.org/10.1016/S1161-0301(02)00107-7)
- Kansas Mesonet, 2020. Kansas Mesonet [WWW Document]. URL <https://mesonet.k-state.edu/> (accessed 1.6.21).
- Kapanigowda, M.H., Perumal, R., Aiken, R.M., Herald, T.J., Bean, S.R., Little, C.R., 2013. Analyses of sorghum [*Sorghum bicolor* (L.) Moench] lines and hybrids in response to early-season planting and cool conditions. *Can. J. Plant Sci.* 93, 773–784. <https://doi.org/10.4141/cjps2012-311>
- Kassie, B.T., Asseng, S., Porter, C.H., Royce, F.S., 2016. Performance of DSSAT-Nwheat across a wide range of current and future growing conditions. *European Journal of Agronomy* 81, 27–36. <https://doi.org/10.1016/j.eja.2016.08.012>
- Kholová, J., Murugesan, T., Kaliamoorthy, S., Malayee, S., Baddam, R., Hammer, G.L., McLean, G., Deshpande, S., Hash, C.T., Craufurd, P.Q., Vadez, V., 2014. Modelling the effect of plant water use traits on yield and stay-green expression in sorghum. *Functional Plant Biol.* 41, 1019–1034. <https://doi.org/10.1071/FP13355>
- Kothari, K., Ale, S., Bordovsky, J.P., Porter, D.O., Munster, C.L., Hoogenboom, G., 2020. Potential benefits of genotype-based adaptation strategies for grain sorghum production in the Texas High Plains under climate change. *European Journal of Agronomy* 117, 126037. <https://doi.org/10.1016/j.eja.2020.126037>
- Laingen, C., 2015. A Spatiotemporal Analysis of Sorghum in the United States. *Papers in Applied Geography* 1, 307–311. <https://doi.org/10.1080/23754931.2015.1084359>
- Lenaerts, B., Collard, B.C.Y., Demont, M., 2019. Review: Improving global food security through accelerated plant breeding. *Plant Science* 287, 110207. <https://doi.org/10.1016/j.plantsci.2019.110207>
- Lin, X., Harrington, J., Ciampitti, I., Gowda, P., Brown, D., Kisekka, I., 2017. Kansas Trends

- and Changes in Temperature, Precipitation, Drought, and Frost-Free Days from the 1890s to 2015. *Journal of Contemporary Water Research & Education* 162, 18–30.  
<https://doi.org/10.1111/j.1936-704X.2017.03257.x>
- Long, N.V., Assefa, Y., Schwalbert, R., Ciampitti, I.A., 2017. Maize Yield and Planting Date Relationship: A Synthesis-Analysis for US High-Yielding Contest-Winner and Field Research Data. *Front. Plant Sci.* 8. <https://doi.org/10.3389/fpls.2017.02106>
- Lopez, J.R., Erickson, J.E., Asseng, S., Bobeda, E.L., 2017. Modification of the CERES grain sorghum model to simulate optimum sweet sorghum rooting depth for rainfed production on coarse textured soils in a sub-tropical environment. *Agricultural Water Management* 181, 47–55. <https://doi.org/10.1016/j.agwat.2016.11.023>
- Lu, H., Xue, J., Guo, D., 2017. Efficacy of planting date adjustment as a cultivation strategy to cope with drought stress and increase rainfed maize yield and water-use efficiency. *Agricultural Water Management, Special Issue on Improving Agricultural Water Productivity to Ensure Food Security under Changing Environments Overseen by: Brent Clothier* 179, 227–235. <https://doi.org/10.1016/j.agwat.2016.09.001>
- Lyons, J.M., 1973. Chilling Injury in Plants. *Annual Review of Plant Physiology* 24, 445–466. <https://doi.org/10.1146/annurev.pp.24.060173.002305>
- Maiga, A., 2012. Effects of planting practices and nitrogen management on grain sorghum production [WWW Document]. URL /paper/Effects-of-planting-practices-and-nitrogen-on-grain-Maiga/2b32e6a422fe1df3c6cd402388eec91fddc44520 (accessed 5.28.20).
- Marla, S.R., Burow, G., Chopra, R., Hayes, C., Olatoye, M.O., Felderhoff, T., Hu, Z., Raymundo, R., Perumal, R., Morris, G.P., 2019. Genetic Architecture of Chilling Tolerance in Sorghum Dissected with a Nested Association Mapping Population. *G3: Genes, Genomes, Genetics* 9, 4045–4057. <https://doi.org/10.1534/g3.119.400353>
- Maulana, F., Tesso, T.T., 2013. Cold Temperature Episode at Seedling and Flowering Stages Reduces Growth and Yield Components in Sorghum. *Crop Science* 53, 564–574. <https://doi.org/10.2135/cropsci2011.12.0649>
- McMaster, G.S., Edmunds, D.A., Jones, S.M., Johnson, J.J., Vigil, M.F., 2016. Simulating the Probability of Grain Sorghum Maturity before the First Frost in Northeastern Colorado. *Agronomy* 6, 44. <https://doi.org/10.3390/agronomy6040044>
- Messina, C.D., Sinclair, T.R., Hammer, G.L., Curan, D., Thompson, J., Oler, Z., Gho, C., Cooper, M., 2015. Limited-Transpiration Trait May Increase Maize Drought Tolerance in the US Corn Belt. *Agronomy Journal* 107, 1978–1986. <https://doi.org/10.2134/agronj15.0016>
- Mocoeur, A., Zhang, Y.-M., Liu, Z.-Q., Shen, X., Zhang, L.-M., Rasmussen, S.K., Jing, H.-C., 2015. Stability and genetic control of morphological, biomass and biofuel traits under temperate maritime and continental conditions in sweet sorghum (*Sorghum bicolor*). *Theor Appl Genet* 128, 1685–1701. <https://doi.org/10.1007/s00122-015-2538-5>
- Mourtzinis, S., Gaspar, A.P., Naeve, S.L., Conley, S.P., 2017. Planting Date, Maturity, and Temperature Effects on Soybean Seed Yield and Composition. *Agronomy Journal* 109, 2040–2049. <https://doi.org/10.2134/agronj2017.05.0247>
- Ostmeyer, T., Bheemanahalli, R., Srikanthan, D., Bean, S., Peiris, K.H.S., Madasamy, P., Perumal, R., Jagadish, S.V.K., 2020. Quantifying the agronomic performance of new grain sorghum hybrids for enhanced early-stage chilling tolerance. *Field Crops Research* 258, 107955. <https://doi.org/10.1016/j.fcr.2020.107955>
- Pachta, C.J., 2007. Improving irrigated cropping systems on the high plains using crop

- simulation models (Thesis). Kansas State University.
- Parra-Londono, S., Fiedler, K., Kavka, M., Samans, B., Wieckhorst, S., Zacharias, A., Uptmoor, R., 2018. Genetic dissection of early-season cold tolerance in sorghum: genome-wide association studies for seedling emergence and survival under field and controlled environment conditions. *Theor Appl Genet* 131, 581–595.  
<https://doi.org/10.1007/s00122-017-3021-2>
- Pražnikar, J., 2017. Particulate matter time-series and Köppen-Geiger climate classes in North America and Europe. *Atmospheric Environment* 150, 136–145.  
<https://doi.org/10.1016/j.atmosenv.2016.11.056>
- Priestley, C.H.B., Taylor, R.J., 1972. On the Assessment of Surface Heat Flux and Evaporation Using Large-Scale Parameters. *Monthly Weather Review* 100, 81–92.  
[https://doi.org/10.1175/1520-0493\(1972\)100<0081:OTAOSH>2.3.CO;2](https://doi.org/10.1175/1520-0493(1972)100<0081:OTAOSH>2.3.CO;2)
- R Core Team, 2017. , R: A language and environment for statistical computing. Foundation for Statistical Computing. Viena, Austria.
- Ritchie, J.T., Singh, U., Godwin, D.C., Bowen, W.T., 1998. Cereal growth, development and yield, in: Tsuji, G.Y., Hoogenboom, G., Thornton, P.K. (Eds.), *Understanding Options for Agricultural Production, Systems Approaches for Sustainable Agricultural Development*. Springer Netherlands, Dordrecht, pp. 79–98. [https://doi.org/10.1007/978-94-017-3624-4\\_5](https://doi.org/10.1007/978-94-017-3624-4_5)
- Roozeboom, K., Fjell, D., 1998. Selection of grain sorghum hybrids, in: *Grain Sorghum Production Handbook*. Kansas State University.
- Schaffasz, A., Windpassinger, S., Friedt, W., Snowdon, R., Wittkop, B., 2019. Sorghum as a Novel Crop for Central Europe: Using a Broad Diversity Set to Dissect Temperate-Adaptation. *Agronomy* 9, 535. <https://doi.org/10.3390/agronomy9090535>
- Schlegel, A.J., Assefa, Y., Haag, L.A., Thompson, C.R., Holman, J.D., Stone, L.R., 2017. Yield and Soil Water in Three Dryland Wheat and Grain Sorghum Rotations. *Agronomy Journal* 109, 227–238. <https://doi.org/10.2134/agronj2016.07.0387>
- Schlegel, A.J., Havlin, J.L., 1997. Green Fallow for the Central Great Plains. *Agronomy Journal* 89, 762–767. <https://doi.org/10.2134/agronj1997.00021962008900050009x>
- Seifert, C.A., Roberts, M.J., Lobell, D.B., 2017. Continuous Corn and Soybean Yield Penalties across Hundreds of Thousands of Fields. *Agronomy Journal* 109, 541–548.  
<https://doi.org/10.2134/agronj2016.03.0134>
- Shavrukov, Y., Kurishbayev, A., Jatayev, S., Shvidchenko, V., Zotova, L., Koekemoer, F., de Groot, S., Soole, K., Langridge, P., 2017. Early Flowering as a Drought Escape Mechanism in Plants: How Can It Aid Wheat Production? *Front. Plant Sci.* 8.  
<https://doi.org/10.3389/fpls.2017.01950>
- Shroyer, James., Kok, H., Fjell, D., 1998. Seedbed preparation and planting practices, in: *Grain Sorghum Production Handbook*. Kansas State University, pp. 5–9.
- Singh, P., Nedumaran, S., Traore, P.C.S., Boote, K.J., Rattunde, H.F.W., Prasad, P.V.V., Singh, N.P., Srinivas, K., Bantilan, M.C.S., 2014. Quantifying potential benefits of drought and heat tolerance in rainy season sorghum for adapting to climate change. *Agricultural and Forest Meteorology* 185, 37–48. <https://doi.org/10.1016/j.agrformet.2013.10.012>
- Singh, S.P., 1985. Sources of cold tolerance in grain Sorghum. *Can. J. Plant Sci.* 65, 251–257.  
<https://doi.org/10.4141/cjps85-037>
- Singh, V., Nguyen, C.T., van Oosterom, E.J., Chapman, S.C., Jordan, D.R., Hammer, G.L., 2015. Sorghum genotypes differ in high temperature responses for seed set. *Field Crops*

- Research 171, 32–40. <https://doi.org/10.1016/j.fcr.2014.11.003>
- Smith, C.W., Frederiksen, R.A., 2000. Sorghum: Origin, History, Technology, and Production. John Wiley & Sons.
- Soil Survey Staff, 2020. Web Soil Survey - Home [WWW Document]. URL <https://websoilsurvey.sc.egov.usda.gov/App/HomePage.htm> (accessed 6.7.19).
- Staggenborg, S.A., Fjell, D.L., Devlin, D.L., Gordon, W.B., Maddux, L.D., Marsh, B.H., 1999a. Selecting Optimum Planting Dates and Plant Populations for Dryland Corn in Kansas. *Journal of Production Agriculture* 12, 85–90. <https://doi.org/10.2134/jpa1999.0085>
- Staggenborg, S.A., Vanderlip, R.L., 2005. Crop Simulation Models Can be Used as Dryland Cropping Systems Research Tools. *Agronomy Journal* 97, 378–384. <https://doi.org/10.2134/agronj2005.0378>
- Staggenborg, S.A., Vanderlip, R.L., 1996. Sorghum Grain Yield Reductions Caused by Duration and Timing of Freezing Temperatures. *Agronomy Journal* 88, 473–477. <https://doi.org/10.2134/agronj1996.00021962008800030019x>
- Staggenborg, S.A., Vanderlip, R.L., Roggenkamp, G.J., Kofoed, K.D., 1999b. Methods of simulating freezing damage during sorghum grain fill. *Agronomy journal*.
- Stickler, F.C., Pauli, A.W., Casady, A.J., 1962. Comparative Responses of Kaoliang and Other Grain Sorghum Types to Temperature. *Crop Science* 2, 136–139. <https://doi.org/10.2135/cropsci1962.0011183X000200020015x>
- Suleiman, A.A., Ritchie, J.T., 2003. Modeling Soil Water Redistribution during Second-Stage Evaporation. *Soil Science Society of America Journal* 67, 377–386. <https://doi.org/10.2136/sssaj2003.3770>
- Taylor, A.O., Rowley, J.A., 1971. Plants under Climatic Stress: I. Low Temperature, High Light Effects on Photosynthesis. *Plant Physiol* 47, 713–718. <https://doi.org/10.1104/pp.47.5.713>
- Tilman, D., Cassman, K.G., Matson, P.A., Naylor, R., Polasky, S., 2002. Agricultural sustainability and intensive production practices. *Nature* 418, 671–677. <https://doi.org/10.1038/nature01014>
- Tirfessa, A., McLean, G., Mace, E., Oosterom, E. van, Jordan, D., Hammer, G., 2020. Differences in temperature response of phenological development among diverse Ethiopian sorghum genotypes are linked to racial grouping and agroecological adaptation. *Crop Science* 60, 977–990. <https://doi.org/10.1002/csc2.20128>
- van Ittersum, M.K., Leffelaar, P.A., van Keulen, H., Kropff, M.J., Bastiaans, L., Goudriaan, J., 2003. On approaches and applications of the Wageningen crop models. *European Journal of Agronomy, Modelling Cropping Systems: Science, Software and Applications* 18, 201–234. [https://doi.org/10.1016/S1161-0301\(02\)00106-5](https://doi.org/10.1016/S1161-0301(02)00106-5)
- Villanueva, R.A.M., Chen, Z.J., 2019. ggplot2: Elegant Graphics for Data Analysis, 2nd edition. *Meas.-Interdiscip. Res. Perspect.* 17, 160–167. <https://doi.org/10.1080/15366367.2019.1565254>
- Wallach, D., Makowski, D., Jones, J.W., Brun, F., 2014. Chapter 9 - Model Evaluation, in: Wallach, D., Makowski, D., Jones, J.W., Brun, F. (Eds.), *Working with Dynamic Crop Models (Second Edition)*. Academic Press, San Diego, pp. 345–406. <https://doi.org/10.1016/B978-0-12-397008-4.00009-5>
- White, J.W., Alagarwamy, G., Ottman, M.J., Porter, C.H., Singh, U., Hoogenboom, G., 2015. An Overview of CERES–Sorghum as Implemented in the Cropping System Model Version 4.5. *Agronomy Journal* 107, 1987. <https://doi.org/10.2134/agronj15.0102>

- Wylie, P., 2008. Managing sorghum for high yields: a blueprint for doubling sorghum production. Grains Research and Development Corp., Kingston, A.C.T.
- Yakoub, A., Lloveras, J., Biau, A., Lindquist, J.L., Lizaso, J.I., 2017. Testing and improving the maize models in DSSAT: Development, growth, yield, and N uptake. *Field Crops Research* 212, 95–106. <https://doi.org/10.1016/j.fcr.2017.07.002>
- Yang, X., Zheng, L., Yang, Q., Wang, Z., Cui, S., Shen, Y., 2018. Modelling the effects of conservation tillage on crop water productivity, soil water dynamics and evapotranspiration of a maize-winter wheat-soybean rotation system on the Loess Plateau of China using APSIM. *Agricultural Systems* 166, 111–123. <https://doi.org/10.1016/j.agsy.2018.08.005>
- Zhang, H., Link to external site, this link will open in a new window, Li, Y., Jian-Kang, Z., 2018. Developing naturally stress-resistant crops for a sustainable agriculture. *Nature Plants*; London 4, 989–996. <http://dx.doi.org.er.lib.k-state.edu/10.1038/s41477-018-0309-4>

**Table 1. Cultivar parameters for CERES-Sorghum model for full- and short-season hybrids\*.**

| <b>Code</b> | <b>Full season</b> | <b>Short season</b> | <b>Description</b>                                                                                                     |
|-------------|--------------------|---------------------|------------------------------------------------------------------------------------------------------------------------|
| P1          | 393                | 250                 | Potential duration from emergence to end of juvenile phase (°C day).                                                   |
| P2          | 102                | 102                 | Potential duration from juvenile phase to panicle initiation (°C day).                                                 |
| P2O         | 15.0               | 15.0                | Critical daylength above which development slows (short day response) (h).                                             |
| P2R         | 40                 | 40                  | Photoperiod sensitivity as the extent to which development is delayed for each hour of photoperiod above P2O (°C day). |
| PANTH       | 617                | 617                 | Duration from panicle initiation to anthesis (°C day).                                                                 |
| P3          | 152                | 152                 | Duration from end of flag leaf expansion to anthesis (°C day).                                                         |
| P4          | 82                 | 82                  | Duration from anthesis to onset of grain filling (°C day).                                                             |
| P5          | 640                | 640                 | Duration of grain-filling phase (onset of grain filling to physiological maturity) (°C day).                           |
| PHINT       | 49                 | 49                  | Phyllochron interval (°C day/leaf).                                                                                    |
| G1          | 3                  | 3                   | Scaler for relative leaf size (unitless).                                                                              |
| G2          | 6.5                | 6.5                 | Scalar for partitioning of assimilates to the panicle (unitless).                                                      |

\* Reproduced from Araya et al. (2018).

**Table 2. Characteristics for the study locations in Kansas.**

| <b>Location</b> | <b>Soil family</b> | <b>Soil texture</b> | <b>Organic matter (%)</b> | <b>Average annual precipitation (mm)</b> | <b>Koppen Climate classification</b> |
|-----------------|--------------------|---------------------|---------------------------|------------------------------------------|--------------------------------------|
| Colby           | Richfield          | Silty clay loam     | 2                         | 520                                      | Cold semi-arid                       |
| Garden City     | Park-Ulysses       | Silt loam           | 2                         | 480                                      | Cold semi-arid                       |
| Hays            | Harney             | Silt loam           | 2                         | 680                                      | Hot-summer humid continental         |
| Manhattan       | Smolan             | Silt loam           | 3                         | 900                                      | Hot-summer humid continental         |

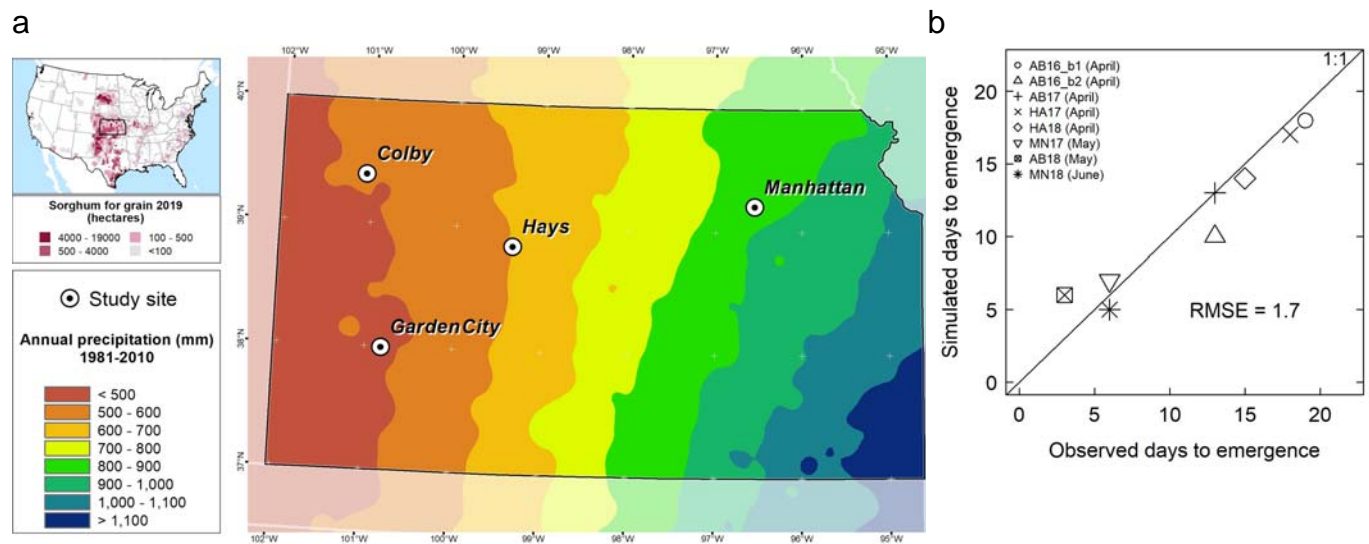

**Figure 1. Study system to evaluate the impact of early planting with CERES-Sorghum.** (a) Annual precipitation gradients across Kansas and locations to simulate the growth and development for sorghum in Kansas. (b) CERES-Sorghum model performance for days to seedling emergence in different planting dates in Kansas, observed information corresponds to experiments conducted in Hays (HA), Manhattan (MA), and Ashland Bottom (AB; 10 km from MA) in 2016–2018 that were planted in April, May and June.

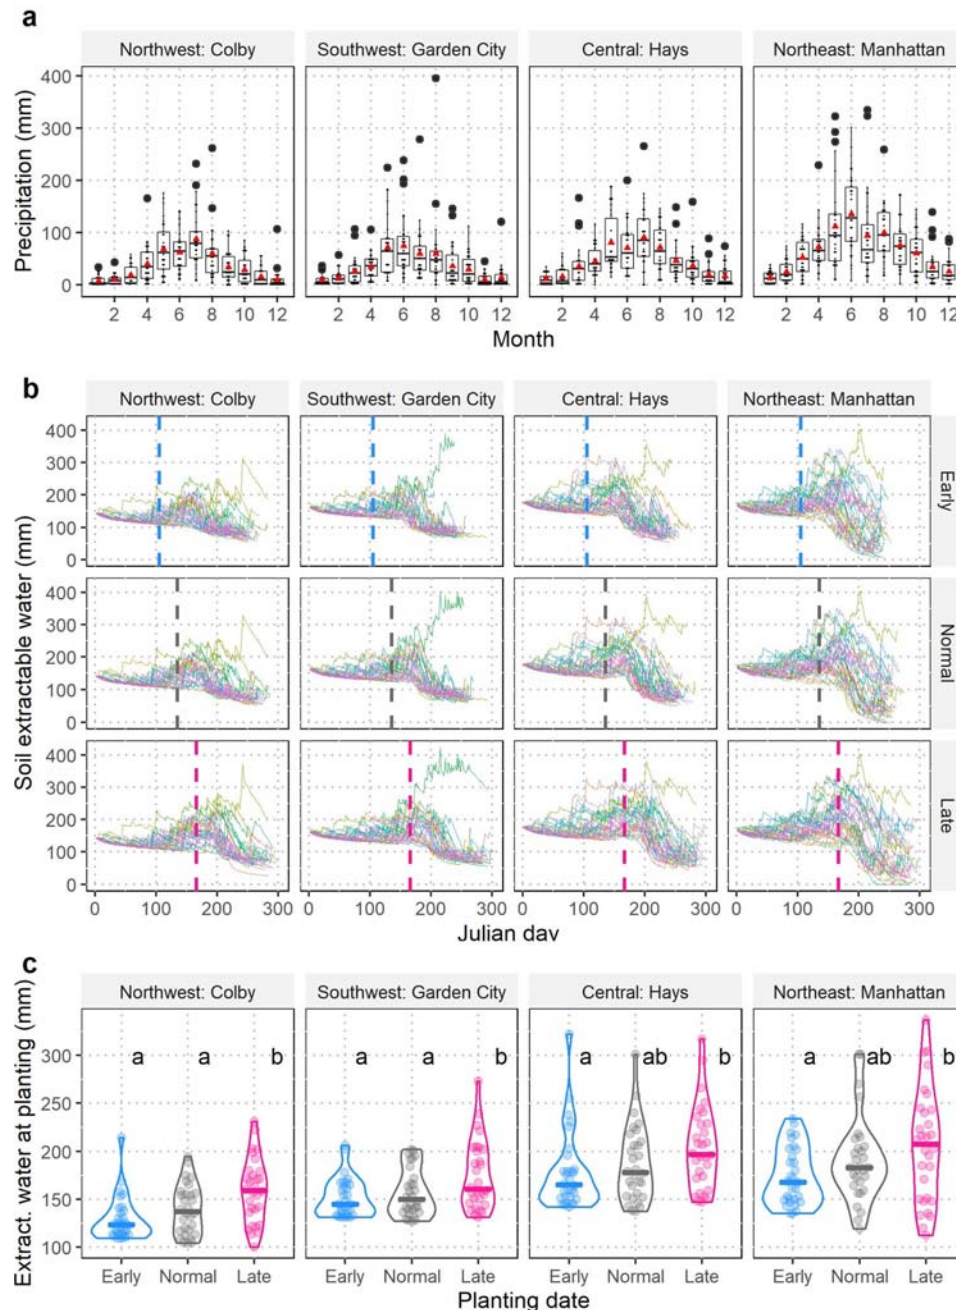

**Figure 2. Effect of precipitation on soil moisture at planting for a simulated full-season hybrid.** (a) Variability of monthly precipitation in four representative locations in Kansas, red triangles represent the monthly mean over a 30 years period. (b) Daily soil extractable water (soil moisture) in different planting dates, vertical dashed lines indicate the planting date at each location. (c) Extractable water at planting for early, normal and late planting dates. Each boxplot and violin plot represent the annual variability of 30 years (1986-2015) in Kansas. Letters represent significant differences ( $\alpha < 0.05$ ) using the Tukey HSD test.

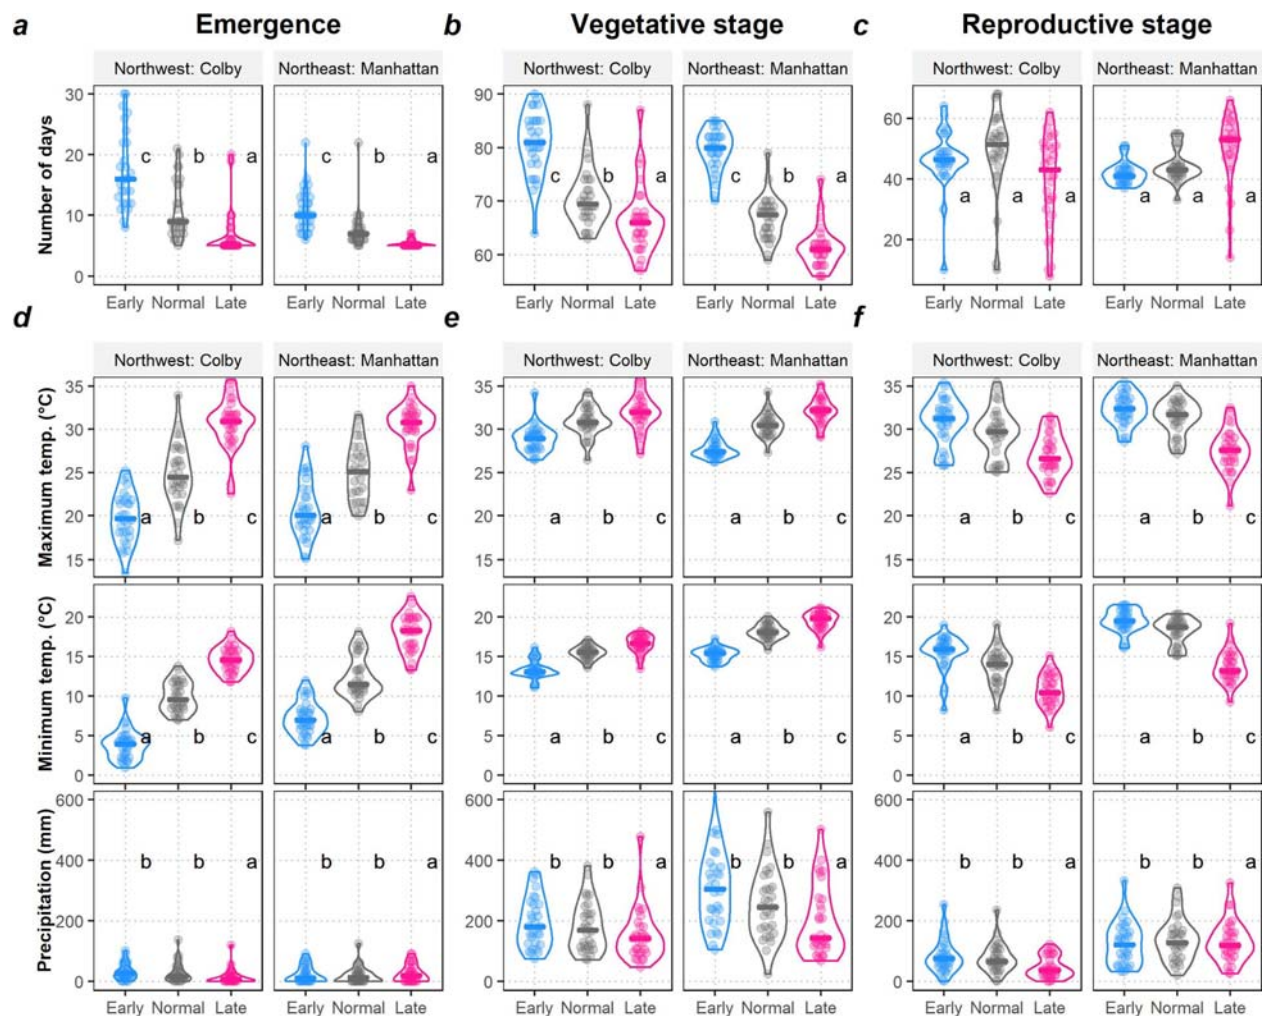

**Figure 3. Crop phenology for a simulated full-season sorghum hybrid in two contrasting locations.** (a) Days for emergence, (b) days for vegetative development and (c) days for reproductive development in different planting dates. Environmental conditions during (d) days to emergence, (e) days for vegetative, and (f) reproductive stage in different planting dates. Each violin plot represents the annual variability of 30 years (1986-2015) at each location in Kansas. Letters indicate significant differences ( $\alpha < 0.05$ ) using the Tukey HSD test.

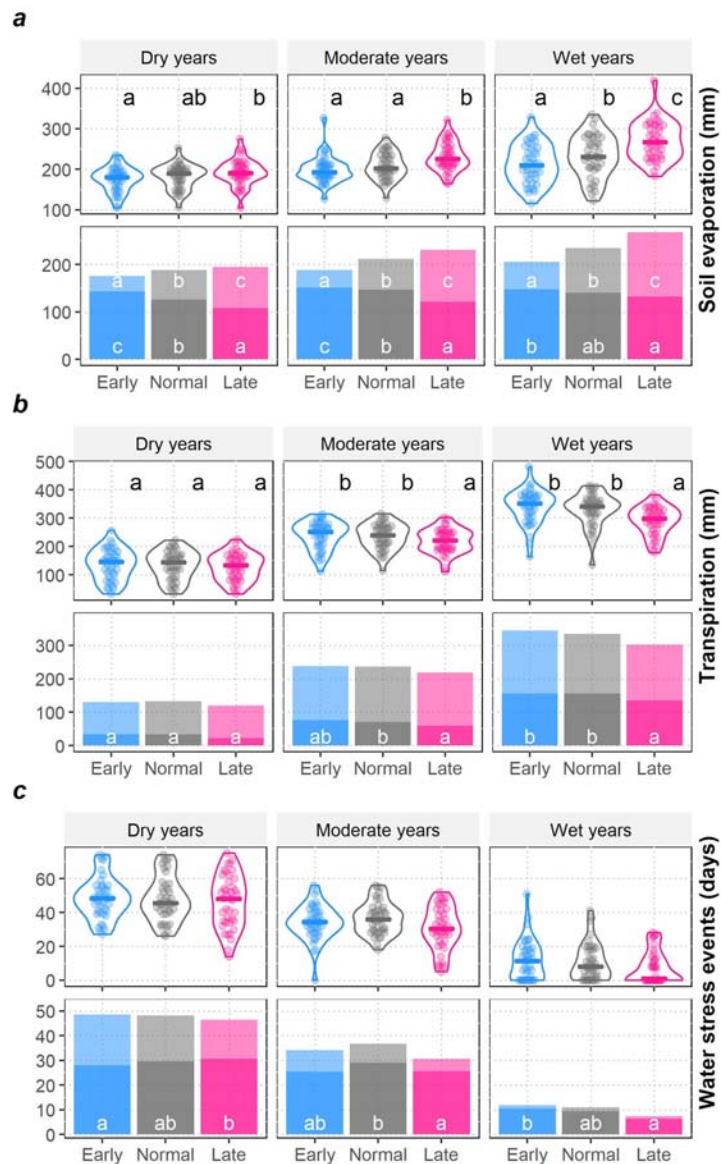

**Figure 4. Water budgets under different levels of precipitation for a simulated full-season sorghum hybrid.** (a) Total soil evaporation across planting dates (upper panel), soil evaporation during fallow periods (upper bars, light colors) and growing periods (lower bars, dark colors) under different planting dates. (b) Plant transpiration or water capture during the growing period (upper panel), and during vegetative (upper bars, light colors) and reproductive stages (lower bars, dark colors) under different planting dates. (c) Water stress events during the growing period (upper panel), and during vegetative (upper bars, light colors) and reproductive stages (lower bars, dark colors). Each violin plot represents the annual variability of 30 years (1986-2015) in Kansas. Each bar plot represents the median of each variable on each phenological stage. Letters represent significant differences ( $\alpha < 0.05$ ) using the Tukey HSD test. Annual precipitation for dry, moderate, and wet years was 161-428 mm, 428-580 mm and 580-1380 mm, respectively.

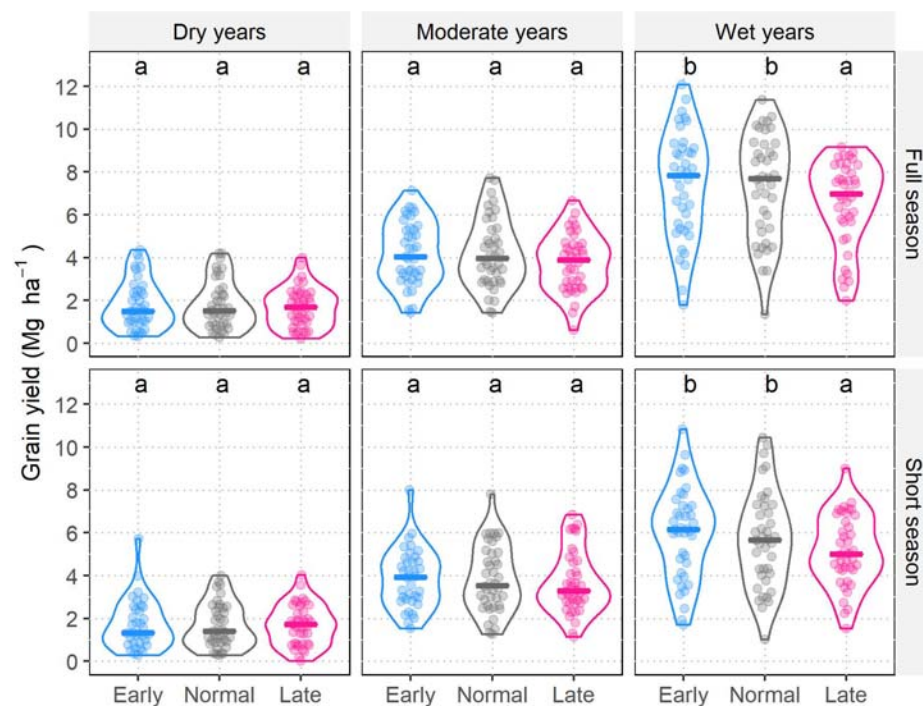

**Figure 5. Grain yield under different levels of precipitation and planting dates for simulated full- and short-season hybrids.** Each violin plot represents the annual variability of 30 years (1986-2015) in Kansas. Letters indicate significant differences ( $\alpha < 0.05$ ) of all pairwise comparisons using the Tukey HSD test. Annual precipitation for dry, moderate, and wet years was 161-428 mm, 428-580 mm, and 580-1380 mm, respectively.

## **SUPPLEMENTARY DATA**

*Included in the review PDF file:*

Supplementary Tables 1-6

Supplementary Figures 1-2

*Uploaded separately:*

Supplementary File 1 - Code

Supplementary File 2 - Data

**Table S1. Soil physical characteristics of study sites in Kansas.**

| Location    | Depth (cm) | LL (cm cm <sup>-1</sup> ) | DUL (cm cm <sup>-1</sup> ) | SAT (cm cm <sup>-1</sup> ) | RGF (-) | BD (g cm <sup>-3</sup> ) | OC (%) | Clay (%) | Silt (%) | pH  |
|-------------|------------|---------------------------|----------------------------|----------------------------|---------|--------------------------|--------|----------|----------|-----|
| Colby       | 0-10       | 0.21                      | 0.39                       | 0.43                       | 1.00    | 1.43                     | 1.16   | 30       | 52       | 7.2 |
|             | 10-27      | 0.25                      | 0.43                       | 0.43                       | 1.00    | 1.43                     | 0.87   | 39       | 54       | 7.5 |
|             | 10-56      | 0.16                      | 0.34                       | 0.44                       | 0.44    | 1.43                     | 0.29   | 25       | 63       | 7.5 |
|             | 56-194     | 0.16                      | 0.32                       | 0.49                       | 0.08    | 1.28                     | 0.29   | 25       | 52       | 8.5 |
| Garden City | 0-15       | 0.18                      | 0.37                       | 0.49                       | 1.00    | 1.3                      | 1.2    | 24       | 60       | 7.9 |
|             | 10-32      | 0.17                      | 0.35                       | 0.48                       | 0.63    | 1.3                      | 0.6    | 26       | 59       | 7.9 |
|             | 32-74      | 0.15                      | 0.33                       | 0.46                       | 0.35    | 1.4                      | 0.3    | 23       | 64       | 8.5 |
|             | 74-194     | 0.15                      | 0.33                       | 0.46                       | 0.07    | 1.4                      | 0.3    | 23       | 64       | 8.5 |
| Hays        | 0-15       | 0.18                      | 0.39                       | 0.43                       | 1.00    | 1.44                     | 1.16   | 24       | 67       | 6.7 |
|             | 15-22      | 0.19                      | 0.40                       | 0.47                       | 1.00    | 1.31                     | 1.16   | 26       | 67       | 6.7 |
|             | 22-32      | 0.22                      | 0.40                       | 0.45                       | 0.58    | 1.38                     | 0.58   | 35       | 60       | 7.3 |
|             | 32-64      | 0.23                      | 0.41                       | 0.45                       | 0.38    | 1.38                     | 0.46   | 39       | 56       | 7.3 |
|             | 64-88      | 0.18                      | 0.37                       | 0.44                       | 0.22    | 1.42                     | 0.29   | 30       | 64       | 7.9 |
|             | 88-194     | 0.16                      | 0.35                       | 0.44                       | 0.06    | 1.42                     | 0.29   | 25       | 69       | 7.9 |
| Manhattan   | 0-17       | 0.19                      | 0.41                       | 0.44                       | 1.00    | 1.4                      | 1.7    | 24       | 64       | 6.5 |
|             | 17-29      | 0.21                      | 0.40                       | 0.45                       | 0.63    | 1.4                      | 1.2    | 30       | 58       | 6.5 |
|             | 29-39      | 0.22                      | 0.40                       | 0.44                       | 0.51    | 1.4                      | 0.9    | 33       | 58       | 6.5 |
|             | 39-69      | 0.25                      | 0.43                       | 0.44                       | 0.34    | 1.4                      | 0.6    | 42       | 51       | 6.7 |
|             | 69-91      | 0.23                      | 0.40                       | 0.45                       | 0.20    | 1.4                      | 0.4    | 39       | 54       | 6.7 |
|             | 91-130     | 0.21                      | 0.38                       | 0.44                       | 0.11    | 1.4                      | 0.2    | 36       | 54       | 7.2 |
|             | 130-194    | 0.19                      | 0.36                       | 0.44                       | 0.04    | 1.4                      | 0.1    | 32       | 56       | 7.2 |

LL, DUL, SAT and RGF were estimated using a pedotransfer function embedded in the Sbuild tool of DSSAT suit.

LL: lower limit

DUL: drainage upper limit

SAT: saturation

RGF: root growth factor

BD: bulk density

OC: organic carbon

**Table S2. Phenology development and environmental conditions during the growing period and during vegetative and reproductive stage for a simulated full- and short-season hybrids in three planting dates across representative sites in Kansas. Each value represents the overall mean over four locations and 30 years (1986-2015).**

| Planting date       | Phenology            | Days |    | Tmax (° C) |     | Tmin (° C) |     | Prec (mm) |     |
|---------------------|----------------------|------|----|------------|-----|------------|-----|-----------|-----|
|                     |                      | mean | sd | mean       | sd  | mean       | sd  | mean      | sd  |
| Full season hybrid  |                      |      |    |            |     |            |     |           |     |
| Early               | Total growing season | 139  | 7  | 28.7       | 1.2 | 14.2       | 1.3 | 347       | 157 |
|                     | Emergence            | 16   | 5  | 20.6       | 2.9 | 5.2        | 2.3 | 26        | 27  |
|                     | Vegetative           | 79   | 1  | 28.6       | 1.4 | 14.1       | 1.2 | 220       | 111 |
|                     | Reproductive         | 44   | 2  | 32.0       | 2.3 | 17.6       | 2.3 | 101       | 73  |
| Normal              | Total growing season | 124  | 6  | 30.5       | 1.6 | 16.0       | 1.6 | 319       | 151 |
|                     | Emergence            | 10   | 2  | 25.3       | 3.4 | 10.9       | 2.4 | 25        | 31  |
|                     | Vegetative           | 68   | 2  | 31.1       | 1.6 | 16.7       | 1.3 | 194       | 104 |
|                     | Reproductive         | 46   | 2  | 30.8       | 2.4 | 16.2       | 2.5 | 100       | 71  |
| Late                | Total growing season | 116  | 2  | 30.2       | 1.6 | 15.5       | 1.4 | 263       | 139 |
|                     | Emergence            | 6    | 1  | 31.0       | 2.7 | 16.1       | 2.3 | 19        | 26  |
|                     | Vegetative           | 63   | 2  | 32.5       | 1.7 | 18.1       | 1.5 | 162       | 104 |
|                     | Reproductive         | 48   | 5  | 27.4       | 2.3 | 12.2       | 2.2 | 82        | 62  |
| Short season hybrid |                      |      |    |            |     |            |     |           |     |
| Early               | Total growing season | 121  | 4  | 28.4       | 1.2 | 13.8       | 1.4 | 310       | 147 |
|                     | Emergence            | 16   | 5  | 20.6       | 2.9 | 5.2        | 2.3 | 26        | 27  |
|                     | Vegetative           | 68   | 1  | 27.9       | 1.5 | 13.4       | 1.3 | 185       | 100 |
|                     | Reproductive         | 37   | 2  | 32.7       | 2.1 | 18.4       | 1.7 | 99        | 72  |
| Normal              | Total growing season | 107  | 5  | 30.8       | 1.4 | 16.4       | 1.4 | 286       | 136 |
|                     | Emergence            | 10   | 2  | 25.3       | 3.4 | 10.9       | 2.4 | 25        | 31  |
|                     | Vegetative           | 57   | 1  | 30.8       | 1.6 | 16.3       | 1.3 | 165       | 95  |
|                     | Reproductive         | 40   | 2  | 32.2       | 2.1 | 17.9       | 1.8 | 97        | 67  |
| Late                | Total growing season | 102  | 2  | 31.2       | 1.9 | 16.5       | 1.7 | 240       | 135 |

|              |    |   |      |     |      |     |     |    |
|--------------|----|---|------|-----|------|-----|-----|----|
| Emergence    | 6  | 1 | 31.0 | 2.7 | 16.2 | 2.3 | 19  | 26 |
| Vegetative   | 51 | 2 | 32.7 | 1.8 | 18.2 | 1.5 | 136 | 95 |
| Reproductive | 45 | 1 | 29.7 | 2.6 | 14.9 | 2.5 | 85  | 64 |

Emergence: from planting to emergence.

Vegetative: from to emergence to anthesis.

Reproductive: from to anthesis to harvest.

**Table S3. Transpiration (mm) during the growing period and during vegetative and reproductive stage for a simulated full- and short-season hybrids in three planting dates across representative sites in Kansas. Each value represents the great mean over four locations and 30 years (1986-2015).**

| Hybrid                     | Planting date | Total<br>(mm) |     | Vegetative<br>(mm) |    | Reproductive<br>(mm) |    |
|----------------------------|---------------|---------------|-----|--------------------|----|----------------------|----|
|                            |               | mean          | sd  | mean               | sd | mean                 | sd |
| Full season                |               |               |     |                    |    |                      |    |
|                            | Early         | 236           | 104 | 149                | 58 | 87                   | 61 |
|                            | Normal        | 232           | 97  | 147                | 53 | 86                   | 58 |
|                            | Late          | 211           | 84  | 141                | 44 | 70                   | 53 |
| Short season               |               |               |     |                    |    |                      |    |
|                            | Early         | 200           | 99  | 119                | 56 | 80                   | 56 |
|                            | Normal        | 202           | 81  | 120                | 42 | 81                   | 52 |
|                            | Late          | 178           | 67  | 107                | 36 | 72                   | 44 |
|                            |               |               |     |                    |    |                      |    |
| Source of variation        | df            | Total         |     | Vegetative         |    | Reproductive         |    |
| Planting date (PD)         | 2             | <0.001        |     | <0.001             |    | <0.001               |    |
| Hybrid (V)                 | 1             | <0.001        |     | <0.001             |    | 0.1                  |    |
| Precipitation levels (dnw) | 2             | <0.001        |     | <0.001             |    | <0.001               |    |
| PD x dnw                   | 4             | <0.001        |     | 0.3                |    | <0.001               |    |

**Table S4. Water stress events (days) during the growing period and during vegetative and reproductive stage for a simulated full- and short-season hybrids in three planting dates across representative sites in Kansas. Each value represents the great mean over four locations and 30 years (1986-2015).**

|                            | Planting date | Total  |    | Vegetative |    | Reproductive |    |
|----------------------------|---------------|--------|----|------------|----|--------------|----|
| Hybrid                     |               | mean   | sd | mean       | sd | mean         | sd |
| Full season                |               |        |    |            |    |              |    |
|                            | Early         | 31     | 19 | 10         | 10 | 21           | 13 |
|                            | Normal        | 32     | 19 | 9          | 9  | 23           | 14 |
|                            | Late          | 28     | 20 | 7          | 9  | 21           | 16 |
| Short season               |               |        |    |            |    |              |    |
|                            | Early         | 23     | 17 | 7          | 8  | 16           | 12 |
|                            | Normal        | 25     | 17 | 6          | 8  | 18           | 12 |
|                            | Late          | 24     | 19 | 5          | 7  | 19           | 15 |
|                            |               |        |    |            |    |              |    |
| Source of variation        | df            | Total  |    | Vegetative |    | Reproductive |    |
| Planting date (PD)         | 2             | 0.04   |    | <0.001     |    | 0.15         |    |
| Hybrid (V)                 | 1             | <0.001 |    | <0.001     |    | <0.001       |    |
| Precipitation levels (dnw) | 2             | <0.001 |    | <0.001     |    | <0.001       |    |
| PD x dnw                   | 4             | 0.16   |    | 0.2        |    | <0.001       |    |

**Table S5. Grain yield (Mg ha<sup>-1</sup>) for a simulated full- and short-season hybrids in three planting dates across representative sites in Kansas. Each value represents the great mean over four locations and 30 years (1986-2015).**

| Hybrid                     | Planting date | Grain (Mg ha <sup>-1</sup> ) |     | group (PDxV) |
|----------------------------|---------------|------------------------------|-----|--------------|
|                            |               | mean                         | sd  |              |
| Full season                |               |                              |     |              |
|                            | Early         | 4.4                          | 2.9 | b            |
|                            | Normal        | 4.4                          | 2.9 | b            |
|                            | Late          | 4.0                          | 2.5 | a            |
| Short season               |               |                              |     |              |
|                            | Early         | 3.7                          | 2.5 | a            |
|                            | Normal        | 3.7                          | 2.4 | a            |
|                            | Late          | 3.5                          | 1.9 | a            |
| Source of variation        | df            | P>F                          |     |              |
| Planting date (PD)         | 2             | 0.005                        | **  |              |
| Hybrid (V)                 | 1             | <0.001                       | *** |              |
| Precipitation levels (dnw) | 2             | <0.001                       | *** |              |
| PD x V                     | 2             | 0.08                         |     |              |
| PD x dnw                   | 4             | <0.001                       | *** |              |

**Table S6. Simulated grain yield (Mg ha<sup>-1</sup>) in different planting dates for a full and short season hybrid in four contrasting sites in Kansas (1986-2015). Each value represents the great mean over four locations and 30 years (1986-2015)**

| Location    | Planting date | Full season |     | Short season |     |
|-------------|---------------|-------------|-----|--------------|-----|
|             |               | mean        | sd  | mean         | sd  |
| All         | Early         | 4.4         | 2.9 | 3.7          | 2.5 |
|             | Normal        | 4.4         | 2.9 | 3.7          | 2.3 |
|             | Late          | 3.9         | 2.5 | 3.5          | 1.9 |
| Colby       | Early         | 3.7         | 2.8 | 3.0          | 2.7 |
|             | Normal        | 3.6         | 2.9 | 3.3          | 2.5 |
|             | Late          | 2.6         | 1.8 | 2.9          | 2.0 |
| Garden City | Early         | 2.8         | 2.4 | 2.5          | 2.3 |
|             | Normal        | 2.9         | 2.3 | 2.9          | 2.4 |
|             | Late          | 2.5         | 1.9 | 2.5          | 1.9 |
| Hayes       | Early         | 4.8         | 2.7 | 4.0          | 2.3 |
|             | Normal        | 5.1         | 2.8 | 4.2          | 2.3 |
|             | Late          | 4.9         | 2.2 | 4.3          | 1.9 |
| Manhattan   | Early         | 6.2         | 2.6 | 5.0          | 2.5 |
|             | Normal        | 6.0         | 2.6 | 4.4          | 1.9 |
|             | Late          | 5.9         | 2.3 | 4.2          | 1.5 |

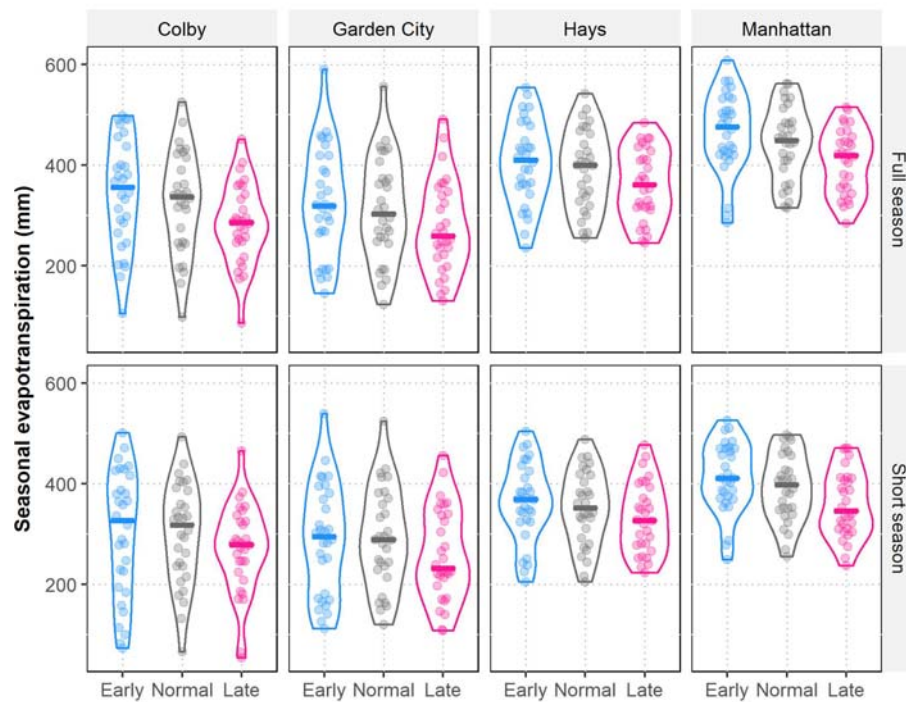

**Figure S1. Seasonal evapotranspiration in four contrasting locations and different planting dates for a simulated full-and short-season hybrids.** Each violin plot represents the annual variability of 30 years (1986-2015) in Kansas.

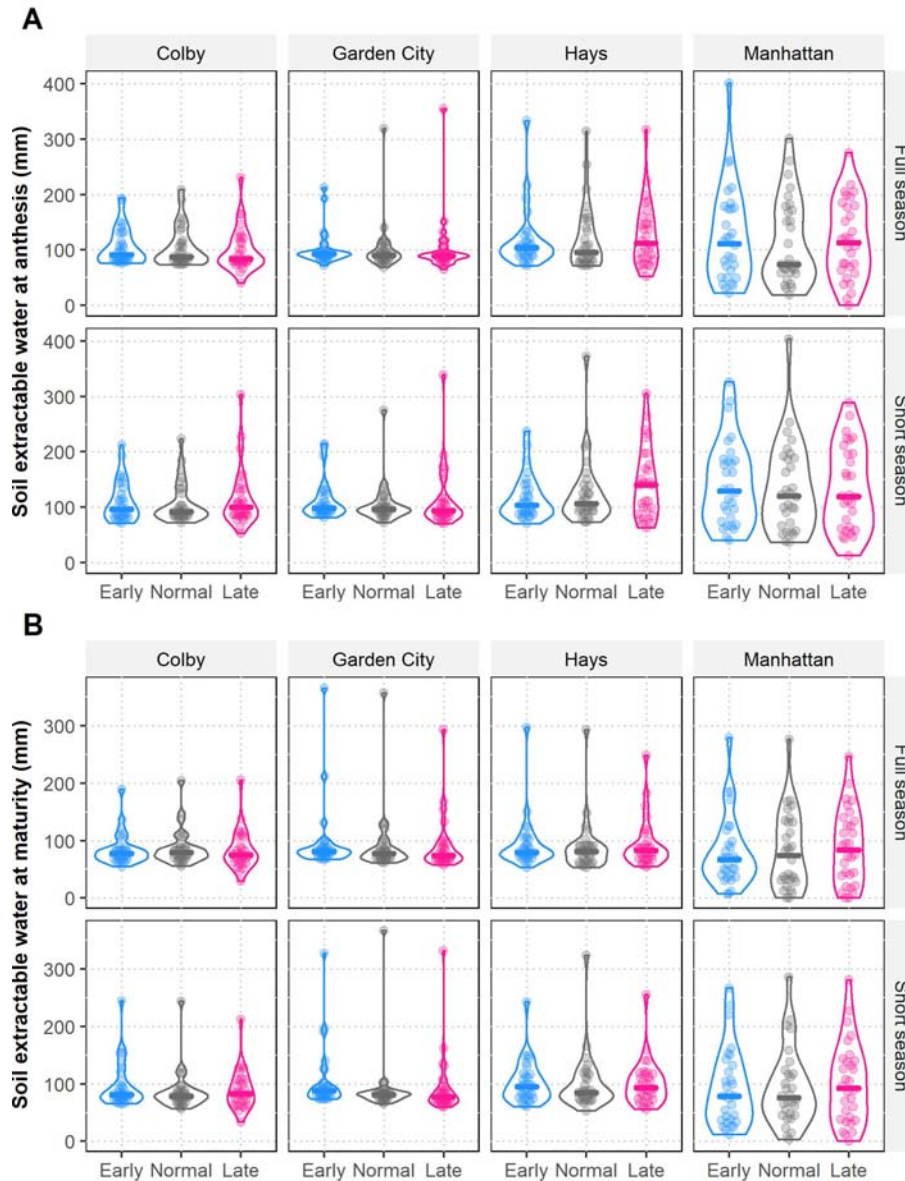

**Figure S2. Soil extractable water at (A) anthesis and (B) maturity in four contrasting locations and different planting dates in Kansas for a simulated full-and short-season hybrids. Each violin plot represents the annual variability of 30 years (1986-2015).**
